# Supplementary material for: Withanolide C Inhibits Proliferation of Breast Cancer Cells via Oxidative Stress-Mediated Apoptosis and DNA Damage
Source: PubMed Central journal article supplement (PMC7555407; doi:10.3390/antiox9090873), 2020-09-16
Supplement: antioxidants-09-00873-s001.pdf [file antioxidants-09-00873-s001.pdf]

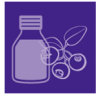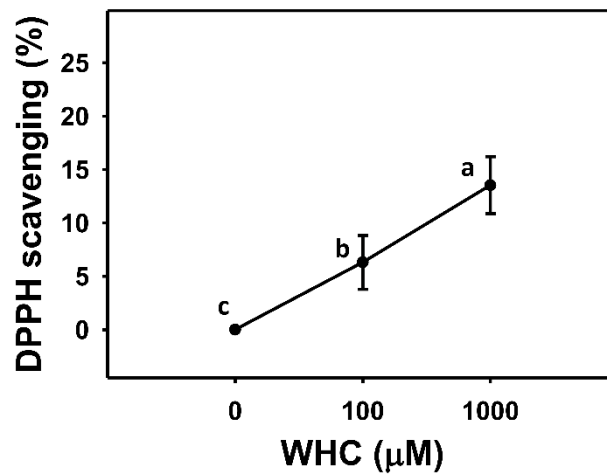

1

2 **Supplementary Figure S1.** The DPPH radical scavenging activity of WHC. WHC dose-responsively  
3 induces the DPPH, suggesting that WHC exhibits a potential antioxidant property. Significance for  
4 multiple comparison was determined by the analysis of variance (ANOVA) coupled with Tukey's  
5 HSD Post-Hoc Tests using JMP®12 software. Results marked without overlapping letters show  
6 significant differences ( $P < 0.05$ ).

7
